# Supplementary material
Source: PubMed Central journal article supplement (PMC2920636)

**Online material**  
**Figures**

**Supplementary Figure 1.** Network on molecules involved in cardiovascular system development and function, organ morphology and organismal functions (4 days p. i.) over-represented in *E. bovis*-infected endothelial host cells. Gene symbols were colored according to the respective regulatory state (red indicating up- and green down-regulation).

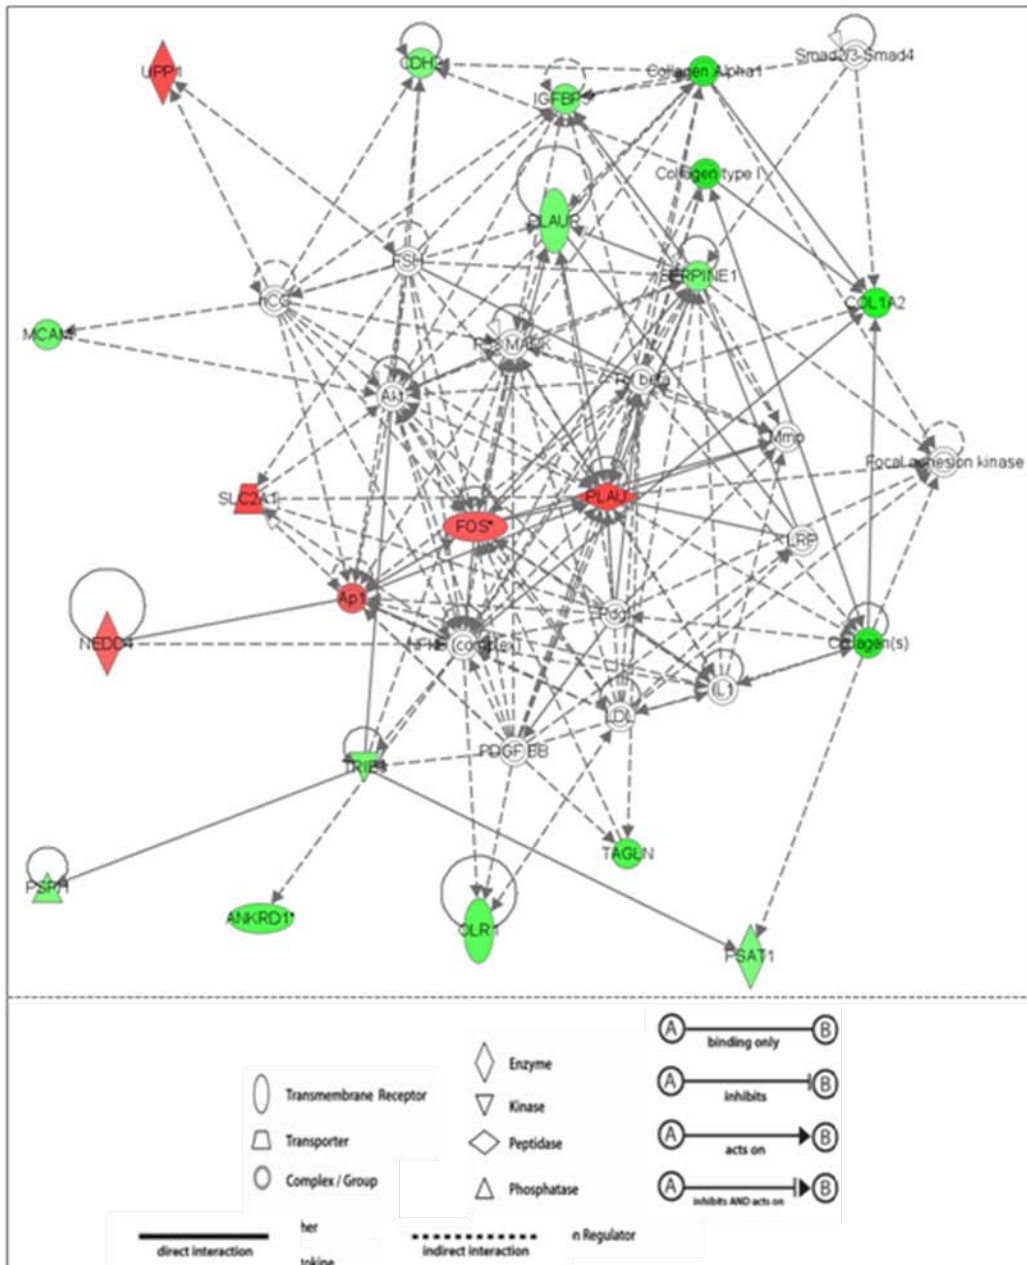

**Supplementary Figure 2.** Network on molecules involved in cell cycle, cellular development and cellular growth and proliferation (14 days p. i.) over-represented in *E. bovis*-infected endothelial host cells. Gene symbols were colored according to the respective regulatory state (red indicating up- and green down-regulation).

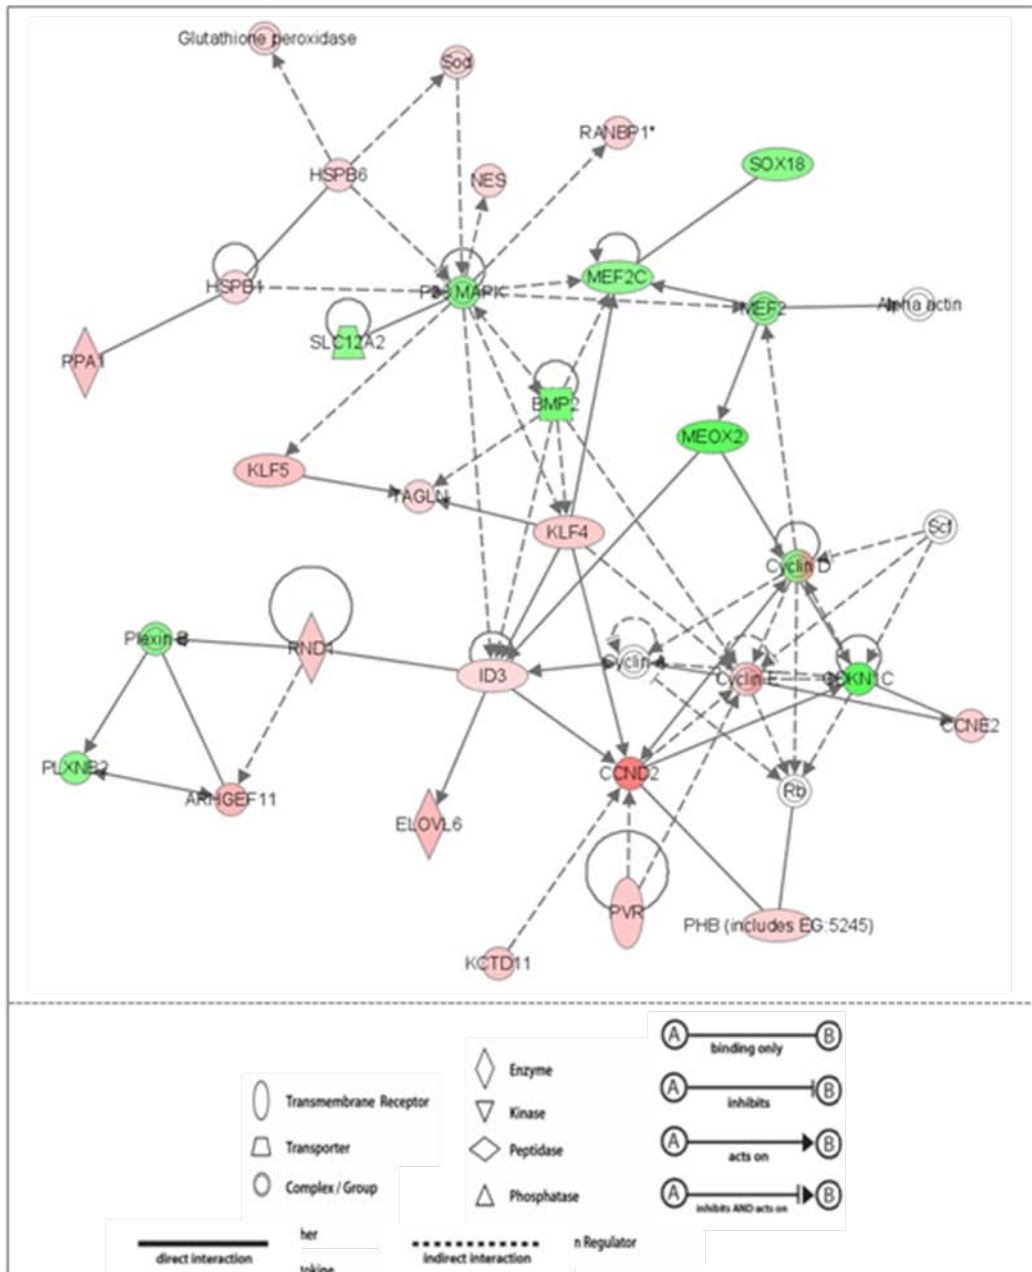

Supplement: vetres-41-70-s1.pdf [file vetres-41-70-s1.pdf]
